# Supplementary material for: Dlk1-Dio3 cluster miRNAs regulate mitochondrial functions in the dystrophic muscle in Duchenne muscular dystrophy
Source: Life Sci Alliance. 2022 Oct 20;6(1):e202201506. doi: 10.26508/lsa.202201506 (PMC9585966; doi:10.26508/lsa.202201506)
Supplement: Supplementary file 3 [file LSA-2022-01506_TableS3.xlsx]

## Sheet: predicted-combined-targets
			miRs/Emp		mdx/WT		miRNA target prediction
entrezgeneid	ensembl_gene_id	symbol	log2FoldChange.x	padj.x	log2FoldChange.y	padj.y	mirna	source_1	source_2	source_3	source_4	source_5	rank_product	rank_final
235339	ENSMUSG00000000168	Dlat	-0.289195	0.0301804	-0.504498	3.75175e-05	miR-380-5p		118.5		86		50.4752	185
12283	ENSMUSG00000036707	Cab39	-0.290111	0.047943	-0.576165	3.14048e-06	miR-543-3p	438	510.5		365		144.588	547
18674	ENSMUSG00000061904	Slc25a3	-0.290147	0.0187897	-0.624906	1.10962e-07	miR-411-5p		11		597.5		40.5355	205
21685	ENSMUSG00000022389	Tef	-0.305585	0.030188	-2.07335	3.03672e-31	miR-127-5p	89	214			180	50.2617	257
13016	ENSMUSG00000037373	Ctbp1	-0.323042	0.0392939	-0.250256	0.0022939	miR-409-3p	63		524			90.846	336
17955	ENSMUSG00000059119	Nap1l4	-0.326937	0.0187897	-0.369036	0.00304047	miR-673-5p			122		299	95.4961	474
76614	ENSMUSG00000052337	Immt	-0.329254	0.0195802	-0.648808	1.56834e-07	miR-541-5p		118	537			125.863	449
74143	ENSMUSG00000038084	Opa1	-0.331289	0.0466323	-0.434567	0.00139927	miR-381-3p	269	859.5				240.419	864
14359	ENSMUSG00000027680	Fxr1	-0.336555	0.0295623	-0.375989	0.00262653	miR-494-3p	206	217				105.714	411
105559	ENSMUSG00000022139	Mbnl2	-0.344476	0.0259092	-0.514001	1.77723e-06	miR-411-5p	86	25.5				23.4147	96
105559	ENSMUSG00000022139	Mbnl2	-0.344476	0.0259092	-0.514001	1.77723e-06	miR-410-3p	255	327				144.382	515
105559	ENSMUSG00000022139	Mbnl2	-0.344476	0.0259092	-0.514001	1.77723e-06	miR-431-5p	26	50.5				18.1177	75
105559	ENSMUSG00000022139	Mbnl2	-0.344476	0.0259092	-0.514001	1.77723e-06	miR-673-5p		68.5			373	79.9226	392
105559	ENSMUSG00000022139	Mbnl2	-0.344476	0.0259092	-0.514001	1.77723e-06	miR-381-3p	338	881.5		102		104.022	393
105559	ENSMUSG00000022139	Mbnl2	-0.344476	0.0259092	-0.514001	1.77723e-06	miR-495-3p	394	1		25		7.14536	11
217012	ENSMUSG00000018845	Unc45b	-0.350529	0.0325315	-0.396335	0.000690277	miR-377-3p		500		382		218.518	756
24051	ENSMUSG00000029156	Sgcb	-0.354222	0.0229046	-0.233817	0.0392367	miR-377-3p		115.5		113		57.1216	220
83431	ENSMUSG00000018736	Ndel1	-0.359812	0.0331749	-0.266478	0.0427889	miR-381-3p	489	371				212.967	799
66092	ENSMUSG00000041028	Ghitm	-0.359902	0.00477281	-0.632772	3.83608e-06	miR-377-3p			735.5	544		316.272	969
66841	ENSMUSG00000027809	Etfdh	-0.361382	0.0272673	-1.03724	2.1131e-11	miR-433-3p			14		83	17.0441	75
56445	ENSMUSG00000031701	Dnaja2	-0.366226	0.00959739	-0.275982	0.0175064	miR-494-3p	312	74		21		26.1867	91
12450	ENSMUSG00000020326	Ccng1	-0.379339	0.00901984	-0.675101	6.92294e-12	miR-409-3p	169			62		51.1811	202
18242	ENSMUSG00000030934	Oat	-0.379708	0.00649179	-0.954116	1.43545e-17	miR-543-3p			84	112		48.4974	170
11655	ENSMUSG00000032786	Alas1	-0.379905	0.024162	-0.498697	9.54467e-05	miR-299a-3p	12	30				9.48683	19
13382	ENSMUSG00000020664	Dld	-0.381575	0.00107176	-0.567155	4.63193e-06	miR-409-3p		47		119		37.3932	140
110611	ENSMUSG00000034088	Hdlbp	-0.383539	0.0360855	-0.503134	4.46295e-05	miR-540-3p	97	736		10		29.7917	102
65098	ENSMUSG00000030629	Zfand6	-0.388757	0.0161183	-0.172606	0.00952851	miR-300-3p	108	59		5		10.5672	28
112406	ENSMUSG00000058709	Egln2	-0.389083	0.0336255	-0.620737	2.06866e-12	miR-666-5p			98	7		13.0958	48
12876	ENSMUSG00000037852	Cpe	-0.389572	0.0204143	-0.559966	8.48622e-06	miR-409-3p			139	182		79.5267	303
67128	ENSMUSG00000020794	Ube2g1	-0.390254	0.0043702	-0.807956	1.13245e-17	miR-409-3p		105		79		45.5384	181
67128	ENSMUSG00000020794	Ube2g1	-0.390254	0.0043702	-0.807956	1.13245e-17	miR-667-3p	200	66				57.4456	158
66912	ENSMUSG00000020547	Bzw2	-0.391206	0.0179304	-0.640545	1.01201e-06	miR-377-3p	313		428.5			183.112	656
26400	ENSMUSG00000002948	Map2k7	-0.393791	0.022568	-0.327794	0.00305374	miR-370-3p	82	193.5				62.9821	241
270166	ENSMUSG00000015357	Clpx	-0.39398	0.0185051	-0.629907	1.15227e-06	miR-543-3p	449	1259.5				376.004	1052
67615	ENSMUSG00000036241	Ube2r2	-0.394606	0.0122729	-0.289599	0.0018347	miR-300-3p	239	233.5		127		64.0287	264
20918	ENSMUSG00000035530	Eif1	-0.395054	0.013968	-0.334473	0.0033293	miR-540-3p		118	510			122.658	457
20918	ENSMUSG00000035530	Eif1	-0.395054	0.013968	-0.334473	0.0033293	miR-381-3p	669	382.5		146		111.433	423
20638	ENSMUSG00000027404	Snrpb	-0.395232	0.00497287	-0.179905	0.0123416	miR-495-3p	563	90		578		102.748	383
76303	ENSMUSG00000024687	Osbp	-0.395268	0.0131341	-0.279355	0.0228998	miR-495-3p	365	1475.5				366.932	1262
76303	ENSMUSG00000024687	Osbp	-0.395268	0.0131341	-0.279355	0.0228998	miR-134-5p	74	99				42.796	203
100201	ENSMUSG00000043252	Tmem64	-0.395441	0.0344162	-0.495174	0.00353554	miR-410-3p	207	789				202.066	645
13819	ENSMUSG00000024140	Epas1	-0.395912	0.0340344	-1.10909	1.50113e-22	miR-127-5p	58	171				49.7946	252
13819	ENSMUSG00000024140	Epas1	-0.395912	0.0340344	-1.10909	1.50113e-22	miR-540-3p	367.5		696			252.873	857
21769	ENSMUSG00000044477	Zfand3	-0.398408	0.00431077	-0.325317	0.000270221	miR-127-3p		38.5	138			36.4452	123
21769	ENSMUSG00000044477	Zfand3	-0.398408	0.00431077	-0.325317	0.000270221	miR-381-3p	237	108.5				80.1787	295
21769	ENSMUSG00000044477	Zfand3	-0.398408	0.00431077	-0.325317	0.000270221	miR-495-3p	452	521				242.638	937
21769	ENSMUSG00000044477	Zfand3	-0.398408	0.00431077	-0.325317	0.000270221	miR-370-3p	159	432.5				131.118	503
218952	ENSMUSG00000037712	Fermt2	-0.399558	0.00959739	-0.446858	1.13056e-08	miR-376b-3p	35.5			66		24.2023	84
218952	ENSMUSG00000037712	Fermt2	-0.399558	0.00959739	-0.446858	1.13056e-08	miR-154-5p			180	95	109	41.0223	207
67181	ENSMUSG00000018559	Ctdnep1	-0.399817	0.00355566	-0.338087	1.31088e-05	miR-668-3p		182.5	63			53.6132	220
50874	ENSMUSG00000005628	Tmod4	-0.401965	0.0189468	-0.97226	3.90568e-17	miR-541-5p		59	115			41.1856	146
76499	ENSMUSG00000033392	Clasp2	-0.403856	0.0395637	-0.270336	0.0459569	miR-381-3p	703	652.5				338.64	1056
66047	ENSMUSG00000034932	Mrpl54	-0.405295	0.0484793	-0.326614	0.00792492	miR-540-3p		287.5	35			50.156	181
12974	ENSMUSG00000005683	Cs	-0.405445	0.00116256	-0.764556	6.60845e-11	miR-540-3p		744		36		81.8291	307
19087	ENSMUSG00000032601	Prkar2a	-0.410077	0.0135362	-0.648516	1.03098e-09	miR-495-3p		1536.5	320.5			350.873	1229
217337	ENSMUSG00000020780	Srp68	-0.410853	0.0139671	-0.316984	0.0143573	miR-673-5p	519	344			322	128.649	655
20747	ENSMUSG00000057522	Spop	-0.414463	0.0012779	-0.481255	4.43191e-05	miR-494-3p	270	458				175.827	634
56736	ENSMUSG00000060450	Rnf14	-0.415676	0.00897904	-0.221782	0.0459152	miR-410-3p	406	266				164.314	569
56323	ENSMUSG00000036052	Dnajb5	-0.419722	0.0210492	-0.770967	3.90555e-15	miR-381-3p	663	830				370.908	1087
56323	ENSMUSG00000036052	Dnajb5	-0.419722	0.0210492	-0.770967	3.90555e-15	miR-127-5p		375		143		115.785	525
56323	ENSMUSG00000036052	Dnajb5	-0.419722	0.0210492	-0.770967	3.90555e-15	miR-377-3p		590.5	487			268.129	876
56323	ENSMUSG00000036052	Dnajb5	-0.419722	0.0210492	-0.770967	3.90555e-15	miR-543-3p	314	379.5		161		89.2349	340
108116	ENSMUSG00000025790	Slco3a1	-0.419864	0.0237357	-0.68998	3.20115e-08	miR-379-5p			360.5		40	60.0417	270
108116	ENSMUSG00000025790	Slco3a1	-0.419864	0.0237357	-0.68998	3.20115e-08	miR-134-5p		193			122	76.7235	349
66278	ENSMUSG00000061461	Smim20	-0.419874	0.034952	-0.516161	1.55969e-07	miR-673-5p		332.5	336		224	97.5001	488
26397	ENSMUSG00000018932	Map2k3	-0.420453	0.0138243	-0.982745	5.04253e-21	miR-381-3p	554	875				348.12	1064
26397	ENSMUSG00000018932	Map2k3	-0.420453	0.0138243	-0.982745	5.04253e-21	miR-370-3p	113	206				76.2856	304
53901	ENSMUSG00000039601	Rcan2	-0.423424	0.020994	-0.648966	1.27275e-09	miR-381-3p	95	658				125.01	490
56449	ENSMUSG00000030189	Ybx3	-0.423688	0.00764671	-0.877129	3.52298e-18	miR-543-3p		99		179		66.5601	247
67713	ENSMUSG00000027679	Dnajc19	-0.423889	0.0185651	-0.549597	6.57725e-07	miR-377-3p			105.5	135		59.671	231
68703	ENSMUSG00000039852	Rere	-0.424211	0.0146268	-0.768808	2.77621e-12	miR-495-3p		1225.5		175		231.55	895
68703	ENSMUSG00000039852	Rere	-0.424211	0.0146268	-0.768808	2.77621e-12	miR-410-3p	316	637.5		48		71.0147	279
67264	ENSMUSG00000025204	Ndufb8	-0.426627	0.00550435	-0.681706	2.8288e-10	miR-541-5p		6	18			5.19615	13
225020	ENSMUSG00000056121	Fez2	-0.427815	0.0273597	-0.368029	0.000236605	miR-433-3p			76		138	51.2055	262
71452	ENSMUSG00000020864	Ankrd40	-0.431389	0.00579008	-0.601939	9.65863e-08	miR-494-3p	26	229.5				38.6232	142
75406	ENSMUSG00000020153	Ndufs7	-0.433324	0.0102717	-0.635228	1.25016e-06	miR-541-5p		85	9			13.8293	41
99138	ENSMUSG00000027367	Stard7	-0.434254	0.000908057	-0.71299	8.39484e-11	miR-377-3p	90		269			77.7978	303
22003	ENSMUSG00000032366	Tpm1	-0.435039	0.0311824	-0.536833	6.8928e-06	miR-381-3p	423	686.5				269.439	927
227197	ENSMUSG00000025968	Ndufs1	-0.437613	0.000105055	-0.693954	6.83661e-07	miR-541-5p		164.5	18			27.2075	95
67210	ENSMUSG00000007415	Gatad1	-0.440839	0.00484946	-0.364935	7.62758e-05	miR-376b-3p		189		80		61.4817	243
215445	ENSMUSG00000037098	Rab11fip3	-0.442632	0.030893	-0.739551	1.3023e-07	miR-299a-3p	134.5	29				31.227	59
215445	ENSMUSG00000037098	Rab11fip3	-0.442632	0.030893	-0.739551	1.3023e-07	miR-370-3p		413		203		144.775	553
70470	ENSMUSG00000027651	Rprd1b	-0.443683	0.0279788	-0.386465	0.00612084	miR-381-3p	527	539				266.483	917
70470	ENSMUSG00000027651	Rprd1b	-0.443683	0.0279788	-0.386465	0.00612084	miR-370-3p			196	225		105	405.5
230861	ENSMUSG00000028760	Eif4g3	-0.445883	0.00183228	-0.26983	0.0115194	miR-381-3p		265.5		164		104.334	394
58875	ENSMUSG00000029776	Hibadh	-0.448952	0.00128646	-0.675101	1.05977e-12	miR-541-5p	225	349		30		44.3529	159
68795	ENSMUSG00000044308	Ubr3	-0.452338	0.000237226	-0.374052	0.0090047	miR-381-3p	58	112				40.2989	134
68795	ENSMUSG00000044308	Ubr3	-0.452338	0.000237226	-0.374052	0.0090047	miR-543-3p	453	176		320		98.1294	381
15184	ENSMUSG00000008855	Hdac5	-0.454454	0.0252601	-0.647417	7.25451e-10	miR-134-5p	39	113.5				33.266	153
11787	ENSMUSG00000029207	Apbb2	-0.457324	0.0389543	-0.479248	8.82621e-05	miR-411-3p		388			141	116.949	512
54151	ENSMUSG00000053929	Cyhr1	-0.460945	0.0141695	-0.379278	6.36192e-05	miR-673-5p		637.5		7		33.401	124
22138	ENSMUSG00000051747	Ttn	-0.46235	0.00017905	-0.887115	1.60405e-13	miR-433-3p	164.5	209				92.7099	446
320661	ENSMUSG00000029190	D5Ertd579e	-0.462789	0.00440988	-0.451353	0.000634514	miR-377-3p		404		248		158.266	588
320661	ENSMUSG00000029190	D5Ertd579e	-0.462789	0.00440988	-0.451353	0.000634514	miR-673-5p	105	492			113	60.0191	288
236792	ENSMUSG00000061273	Mmgt1	-0.462857	0.0230584	-0.357914	0.000220907	miR-494-3p	204	328				129.337	491
15259	ENSMUSG00000027177	Hipk3	-0.463035	0.0030519	-0.504715	0.000204642	miR-494-3p	194	559.5				164.729	607
15259	ENSMUSG00000027177	Hipk3	-0.463035	0.0030519	-0.504715	0.000204642	miR-431-5p	32	6			3	2.77345	4
15259	ENSMUSG00000027177	Hipk3	-0.463035	0.0030519	-0.504715	0.000204642	miR-127-5p	51	151.5			133	33.6375	171
15259	ENSMUSG00000027177	Hipk3	-0.463035	0.0030519	-0.504715	0.000204642	miR-673-5p	246	35.5			118	33.6688	128
19339	ENSMUSG00000031840	Rab3a	-0.463841	0.0414461	-0.45497	0.000132917	miR-299a-5p	27	126				29.1633	58
77573	ENSMUSG00000029434	Vps33a	-0.465215	0.0473712	-0.278528	0.0307314	miR-134-5p				476	164	139.7	581
69634	ENSMUSG00000025545	Clybl	-0.465237	0.0161183	-0.509909	1.06708e-06	miR-134-5p			459	102.5		108.452	472
100705	ENSMUSG00000042010	Acacb	-0.466399	0.00214453	-1.47994	6.67926e-23	miR-127-3p			154		15	24.0312	88
72479	ENSMUSG00000028383	Hsdl2	-0.468562	0.0344237	-1.00141	3.26437e-13	miR-495-3p	621	1171		190		172.324	680
24131	ENSMUSG00000021798	Ldb3	-0.468861	0.00608131	-0.562014	4.2449e-08	miR-134-5p			336	107	173	61.3011	282
99167	ENSMUSG00000036825	Ssx2ip	-0.469587	0.0474129	-0.341919	0.0399434	miR-494-3p	133	158				72.481	278
99167	ENSMUSG00000036825	Ssx2ip	-0.469587	0.0474129	-0.341919	0.0399434	miR-495-3p	396	253				158.262	629
66075	ENSMUSG00000053768	Chchd3	-0.470188	0.000496621	-0.889222	8.88471e-16	miR-380-5p		71	474	79		46.1778	160
75717	ENSMUSG00000032030	Cul5	-0.470528	0.00243083	-0.357364	0.000244906	miR-381-3p	625	304				217.945	806
75717	ENSMUSG00000032030	Cul5	-0.470528	0.00243083	-0.357364	0.000244906	miR-495-3p		1687		682		536.315	1567
75717	ENSMUSG00000032030	Cul5	-0.470528	0.00243083	-0.357364	0.000244906	miR-134-5p				94	19	21.1305	92
75717	ENSMUSG00000032030	Cul5	-0.470528	0.00243083	-0.357364	0.000244906	miR-411-3p	209	218				106.726	487
77038	ENSMUSG00000027255	Arfgap2	-0.474175	0.0132527	-0.447083	0.00386811	miR-673-5p	252		14		198	29.5763	102
224647	ENSMUSG00000056692	Ilrun	-0.475021	0.000855697	-0.534342	2.4458e-05	miR-370-3p	27	65		282		26.3666	93
224647	ENSMUSG00000056692	Ilrun	-0.475021	0.000855697	-0.534342	2.4458e-05	miR-377-3p	25	89		285		28.6376	93
21991	ENSMUSG00000023456	Tpi1	-0.476735	0.000718264	-0.282237	0.00719758	miR-541-5p	53	469				78.8305	301
16594	ENSMUSG00000024862	Klc2	-0.47693	0.0217346	-0.280528	0.0297166	miR-134-5p			545.5	160		147.716	606
16594	ENSMUSG00000024862	Klc2	-0.47693	0.0217346	-0.280528	0.0297166	miR-127-5p			217	162		93.747	440
16594	ENSMUSG00000024862	Klc2	-0.47693	0.0217346	-0.280528	0.0297166	miR-370-3p	150	123				67.9154	262
23807	ENSMUSG00000064145	Arih2	-0.479235	0.00349873	-0.322513	0.00157464	miR-379-5p	38	139				36.3387	177
23807	ENSMUSG00000064145	Arih2	-0.479235	0.00349873	-0.322513	0.00157464	miR-673-5p	110	251			194	58.3223	276
73945	ENSMUSG00000036990	Otud4	-0.483265	0.0113364	-0.201398	0.0345613	miR-381-3p	170	339.5				120.12	465.5
73945	ENSMUSG00000036990	Otud4	-0.483265	0.0113364	-0.201398	0.0345613	miR-494-3p	187	153				84.5739	328
73945	ENSMUSG00000036990	Otud4	-0.483265	0.0113364	-0.201398	0.0345613	miR-410-3p	159	409				127.506	462
68926	ENSMUSG00000028433	Ubap2	-0.485882	0.021323	-0.443404	0.000754046	miR-494-3p	255	520				182.071	651
207728	ENSMUSG00000110195	Pde2a	-0.48597	0.0371446	-0.788393	0.0230529	miR-379-5p	10	57.5				11.9896	48
226412	ENSMUSG00000056211	R3hdm1	-0.487042	0.00758858	-0.381584	0.00154423	miR-381-3p	318	275		126		74.1747	273
19684	ENSMUSG00000032050	Rdx	-0.488176	0.00116256	-0.255692	0.0387506	miR-410-3p	310	197.5				123.718	450
19684	ENSMUSG00000032050	Rdx	-0.488176	0.00116256	-0.255692	0.0387506	miR-668-3p	93	74				41.4789	171
22608	ENSMUSG00000028639	Ybx1	-0.49001	1.6e-05	-0.400038	3.73172e-06	miR-540-3p		63	81			35.7176	130
18041	ENSMUSG00000027618	Nfs1	-0.490089	0.0010488	-0.618813	4.67464e-06	miR-434-3p	92	196				67.1416	189
22344	ENSMUSG00000018377	Vezf1	-0.490931	0.00156715	-0.448524	1.39536e-05	miR-381-3p	49	112				37.0405	117
22344	ENSMUSG00000018377	Vezf1	-0.490931	0.00156715	-0.448524	1.39536e-05	miR-134-5p		213			60	56.5243	263
22344	ENSMUSG00000018377	Vezf1	-0.490931	0.00156715	-0.448524	1.39536e-05	miR-495-3p	69	138		33		22.6617	49
106877	ENSMUSG00000033032	Afap1l1	-0.498113	0.00550447	-0.41485	3.19512e-05	miR-379-5p			317		48	61.6766	274
225791	ENSMUSG00000049090	Zadh2	-0.498547	0.0146794	-0.481139	8.67779e-08	miR-377-3p		103.5		436		106.214	423
19139	ENSMUSG00000031432	Prps1	-0.49872	0.0213441	-0.546965	4.99067e-07	miR-127-3p			49		4	7	33
18519	ENSMUSG00000000708	Kat2b	-0.501056	0.00357078	-0.630307	3.85044e-07	miR-379-5p		219	185.5			100.778	377
18519	ENSMUSG00000000708	Kat2b	-0.501056	0.00357078	-0.630307	3.85044e-07	miR-495-3p	591	592.5				295.875	1097
18519	ENSMUSG00000000708	Kat2b	-0.501056	0.00357078	-0.630307	3.85044e-07	miR-673-5p	580				205	172.409	839
13171	ENSMUSG00000000340	Dbt	-0.502108	0.0450545	-0.837558	2.33554e-22	miR-433-3p			83		62	35.8678	187
13171	ENSMUSG00000000340	Dbt	-0.502108	0.0450545	-0.837558	2.33554e-22	miR-411-5p	12	94.5	318			23.7261	98
231413	ENSMUSG00000044221	Grsf1	-0.504675	0.000555485	-0.446472	3.47184e-05	miR-127-5p	47		460			73.5187	363
231413	ENSMUSG00000044221	Grsf1	-0.504675	0.000555485	-0.446472	3.47184e-05	miR-377-3p	278	61		24		24.7025	78
17850	ENSMUSG00000023921	Mmut	-0.504685	0.00385707	-0.962148	1.28919e-13	miR-543-3p			147.5	326		109.641	431
16558	ENSMUSG00000038844	Kif16b	-0.504825	0.0368094	-0.537642	0.000695714	miR-433-3p	149	400				122.066	548
16558	ENSMUSG00000038844	Kif16b	-0.504825	0.0368094	-0.537642	0.000695714	miR-541-5p		93		2		6.81909	17
22436	ENSMUSG00000024066	Xdh	-0.505553	0.0263319	-1.23058	1.20475e-10	miR-370-3p			144	295		103.053	399
231872	ENSMUSG00000029610	Aimp2	-0.507615	0.0118404	-0.327536	0.00273943	miR-434-3p	114.5	178.5				71.4812	201
67605	ENSMUSG00000011096	Akt1s1	-0.511326	0.000493771	-0.556941	4.65324e-07	miR-666-5p			11	81	22	8.98764	29
59027	ENSMUSG00000020572	Nampt	-0.512361	7.45e-05	-1.03952	1.2747e-28	miR-410-3p		72		191		58.6345	226
59027	ENSMUSG00000020572	Nampt	-0.512361	7.45e-05	-1.03952	1.2747e-28	miR-381-3p	374	398		84		77.3672	283
245867	ENSMUSG00000027589	Pcmtd2	-0.513374	0.0202718	-0.54091	1.60404e-07	miR-299a-3p	279.5	62				65.8198	138
245867	ENSMUSG00000027589	Pcmtd2	-0.513374	0.0202718	-0.54091	1.60404e-07	miR-369-5p		53	359			68.9692	127
97827	ENSMUSG00000032705	Exd2	-0.516446	0.00498134	-0.291091	0.0125046	miR-154-5p		168.5	249			102.416	415
66427	ENSMUSG00000031924	Cyb5b	-0.516912	0.000270675	-0.235872	0.0119369	miR-495-3p	138	51				41.9464	135
66427	ENSMUSG00000031924	Cyb5b	-0.516912	0.000270675	-0.235872	0.0119369	miR-543-3p		222.5		151		91.6481	353
66427	ENSMUSG00000031924	Cyb5b	-0.516912	0.000270675	-0.235872	0.0119369	miR-370-3p		103.5		236		78.1441	311
216551	ENSMUSG00000042363	Lgalsl	-0.522229	0.000964958	-1.06493	7.25551e-13	miR-494-3p	336	312.5				162.019	598
216551	ENSMUSG00000042363	Lgalsl	-0.522229	0.000964958	-1.06493	7.25551e-13	miR-127-5p	43	332				59.7411	298
216551	ENSMUSG00000042363	Lgalsl	-0.522229	0.000964958	-1.06493	7.25551e-13	miR-411-3p	4	8			191	6.09452	15
12215	ENSMUSG00000023175	Bsg	-0.523038	5.08e-05	-0.352589	0.00101527	miR-379-5p			18.5	155		26.7745	121
108737	ENSMUSG00000036737	Oxsr1	-0.524719	0.000334111	-0.334331	0.00453192	miR-380-5p		249		72		66.9477	246
107515	ENSMUSG00000050199	Lgr4	-0.525885	0.0414819	-0.822973	4.08797e-18	miR-381-3p	124	24				27.2764	77
107515	ENSMUSG00000050199	Lgr4	-0.525885	0.0414819	-0.822973	4.08797e-18	miR-380-5p		125	152	43		31.1616	116
83962	ENSMUSG00000025103	Btbd1	-0.527593	3.71e-05	-0.517295	4.68455e-06	miR-381-3p		1093.5		213		241.307	872
64930	ENSMUSG00000026812	Tsc1	-0.529423	0.00847956	-0.523905	8.51193e-06	miR-543-3p	442	357		160		97.7873	377
29864	ENSMUSG00000028557	Rnf11	-0.53007	0.000791568	-0.279598	0.011756	miR-381-3p	329	643.5				230.061	841
29864	ENSMUSG00000028557	Rnf11	-0.53007	0.000791568	-0.279598	0.011756	miR-154-5p	79	38			67	19.5302	87
18597	ENSMUSG00000031299	Pdha1	-0.530821	3.88e-05	-0.879169	1.86964e-16	miR-673-5p			418		75	88.5297	435
66945	ENSMUSG00000021577	Sdha	-0.534461	8.99e-07	-0.808572	6.1275e-10	miR-411-5p				466	43	70.7778	305
20656	ENSMUSG00000006818	Sod2	-0.536671	7.78e-06	-0.803759	8.44221e-16	miR-376b-3p		71		212		61.3433	242
20656	ENSMUSG00000006818	Sod2	-0.536671	7.78e-06	-0.803759	8.44221e-16	miR-377-3p		514		330		205.925	725
105445	ENSMUSG00000025558	Dock9	-0.536988	0.00995957	-0.630526	0.000279594	miR-410-3p	294	65.5		60		34.9778	127
67287	ENSMUSG00000025237	Parp6	-0.538366	0.0354323	-0.356827	4.55168e-06	miR-540-3p	418.5	316				181.828	654
71750	ENSMUSG00000025404	R3hdm2	-0.541098	0.00467051	-0.36597	0.00570654	miR-495-3p	379			17		40.1342	129
319565	ENSMUSG00000063450	Syne2	-0.541544	0.0411009	-0.683875	7.49319e-06	miR-370-3p		565.5	24			58.2495	227
319565	ENSMUSG00000063450	Syne2	-0.541544	0.0411009	-0.683875	7.49319e-06	miR-494-3p	274	219.5		264		83.7803	323
19344	ENSMUSG00000000711	Rab5b	-0.542689	8.79e-05	-0.442673	0.000398499	miR-154-5p	96	67.5				40.2492	205
19344	ENSMUSG00000000711	Rab5b	-0.542689	8.79e-05	-0.442673	0.000398499	miR-431-5p	87	20			74	16.8321	69
19344	ENSMUSG00000000711	Rab5b	-0.542689	8.79e-05	-0.442673	0.000398499	miR-673-5p	340	633.5			315	135.954	682
78244	ENSMUSG00000044224	Dnajc21	-0.543591	0.00108335	-0.675467	7.86398e-15	miR-494-3p			145.5	278		100.56	398
21384	ENSMUSG00000027868	Tbx15	-0.544128	8.34e-05	-0.608044	4.76306e-07	miR-431-5p		250	380			154.11	534
23802	ENSMUSG00000031751	Amfr	-0.54847	2.83e-05	-0.515294	1.27691e-06	miR-370-3p		347		65		75.0916	296
16452	ENSMUSG00000024789	Jak2	-0.549738	0.00316407	-0.820998	2.54004e-17	miR-381-3p	102			226		75.9144	280
16452	ENSMUSG00000024789	Jak2	-0.549738	0.00316407	-0.820998	2.54004e-17	miR-377-3p		141.5		230		90.2012	358
16452	ENSMUSG00000024789	Jak2	-0.549738	0.00316407	-0.820998	2.54004e-17	miR-433-3p	81	227.5			10	18.9686	86
74610	ENSMUSG00000028973	Abcb8	-0.550155	0.0172323	-0.793141	7.95494e-12	miR-431-5p			10	38		9.74679	33
110157	ENSMUSG00000000441	Raf1	-0.555315	0.000597885	-0.481803	0.00633104	miR-370-3p		357.5		308		165.914	625
12339	ENSMUSG00000021893	Capn7	-0.55812	0.000914087	-0.262147	0.000586285	miR-411-3p	92	391				94.8314	446
14245	ENSMUSG00000020593	Lpin1	-0.560215	0.000824191	-1.58005	1.8756e-25	miR-673-5p	62		750			107.819	550
13518	ENSMUSG00000026131	Dst	-0.564516	0.00209391	-0.751849	2.06499e-12	miR-134-5p	19	204				31.1288	140
13518	ENSMUSG00000026131	Dst	-0.564516	0.00209391	-0.751849	2.06499e-12	miR-668-3p	56	108				38.8844	159
74770	ENSMUSG00000032523	Hhatl	-0.565159	0.00367572	-0.757714	4.06744e-05	miR-379-5p		190.5	214.5			101.072	381
66904	ENSMUSG00000032527	Pccb	-0.567929	0.000107609	-0.738698	9.27993e-13	miR-433-3p	133	107			30	25.0995	122
21687	ENSMUSG00000006386	Tek	-0.568774	0.00726368	-0.608446	8.00363e-05	miR-299a-3p	366.5	96				93.787	185
381511	ENSMUSG00000049225	Pdp1	-0.569234	0.000265506	-0.520728	2.13394e-05	miR-667-3p	131		112			60.564	169
12293	ENSMUSG00000040118	Cacna2d1	-0.57018	0.000336596	-0.49806	3.2056e-05	miR-381-3p	132	285.5				97.0644	360
12293	ENSMUSG00000040118	Cacna2d1	-0.57018	0.000336596	-0.49806	3.2056e-05	miR-494-3p	328	89.5				85.668	335
12293	ENSMUSG00000040118	Cacna2d1	-0.57018	0.000336596	-0.49806	3.2056e-05	miR-377-3p	39	253		168		39.4497	134
353187	ENSMUSG00000021775	Nr1d2	-0.571964	0.000137871	-2.27563	5.31443e-50	miR-543-3p	392	100		39		38.3998	128
353187	ENSMUSG00000021775	Nr1d2	-0.571964	0.000137871	-2.27563	5.31443e-50	miR-667-3p	38.5	281	13			17.3347	45
20663	ENSMUSG00000034801	Sos2	-0.572341	0.00169439	-0.438868	0.000597769	miR-381-3p	558	517				268.554	925
20663	ENSMUSG00000034801	Sos2	-0.572341	0.00169439	-0.438868	0.000597769	miR-154-5p	7	36		210	27	8.64343	32
320717	ENSMUSG00000038582	Pptc7	-0.576143	0.00023089	-0.810052	0.000134414	miR-411-5p	17	71.5				17.432	72
320717	ENSMUSG00000038582	Pptc7	-0.576143	0.00023089	-0.810052	0.000134414	miR-543-3p	431	680.5				270.784	878
68291	ENSMUSG00000032342	Mto1	-0.585734	0.0159041	-0.384961	0.00277903	miR-541-5p		331	78			80.3399	305
68519	ENSMUSG00000058070	Eml1	-0.587632	0.00136422	-0.82582	1.76485e-08	miR-376b-3p	96			52		35.327	134
57443	ENSMUSG00000027180	Fbxo3	-0.589436	5.39e-05	-0.660308	1.28422e-14	miR-495-3p		323		466		193.983	763
14385	ENSMUSG00000032114	Slc37a4	-0.590716	0.000550346	-0.625878	0.00101679	miR-381-3p		991.5	2			22.2654	55
17859	ENSMUSG00000025025	Mxi1	-0.590792	0.00104225	-0.767572	1.31847e-07	miR-433-3p	127	40			114	27.7844	139
246710	ENSMUSG00000022075	Rhobtb2	-0.591048	0.0154191	-0.511714	0.000417854	miR-370-3p	18			293		36.3112	134
381269	ENSMUSG00000039395	Mreg	-0.591775	0.00619045	-1.70803	1.35534e-19	miR-381-3p			82.5	111		47.8474	158
381269	ENSMUSG00000039395	Mreg	-0.591775	0.00619045	-1.70803	1.35534e-19	miR-134-5p			177		136	77.5758	356
20744	ENSMUSG00000026915	Strbp	-0.593741	0.030634	-0.492419	8.31847e-08	miR-381-3p	21	227.5				34.5597	103
20744	ENSMUSG00000026915	Strbp	-0.593741	0.030634	-0.492419	8.31847e-08	miR-495-3p	18	284.5				35.7806	104
20744	ENSMUSG00000026915	Strbp	-0.593741	0.030634	-0.492419	8.31847e-08	miR-134-5p	22	22.5				11.1243	39
20744	ENSMUSG00000026915	Strbp	-0.593741	0.030634	-0.492419	8.31847e-08	miR-673-5p	1	90.5				4.75657	10
20744	ENSMUSG00000026915	Strbp	-0.593741	0.030634	-0.492419	8.31847e-08	miR-668-3p	3	40.5				5.51135	12
20744	ENSMUSG00000026915	Strbp	-0.593741	0.030634	-0.492419	8.31847e-08	miR-543-3p	18	164.5		222		28.9829	86
217718	ENSMUSG00000034290	Nek9	-0.593816	0.000262778	-0.549132	2.66606e-06	miR-494-3p	60	500.5				86.6458	339
217718	ENSMUSG00000034290	Nek9	-0.593816	0.000262778	-0.549132	2.66606e-06	miR-370-3p	41	53		44		15.2423	42
74106	ENSMUSG00000026571	Dcaf6	-0.596681	0.000185986	-0.65273	1.8571e-08	miR-381-3p	658	595.5				312.985	1023
74106	ENSMUSG00000026571	Dcaf6	-0.596681	0.000185986	-0.65273	1.8571e-08	miR-434-3p	40		10			10	20
74106	ENSMUSG00000026571	Dcaf6	-0.596681	0.000185986	-0.65273	1.8571e-08	miR-495-3p	648	256		694		162.157	646
12176	ENSMUSG00000078566	Bnip3	-0.598267	1.54e-05	-1.04538	9.61774e-10	miR-411-5p		146			42	39.1535	196
229211	ENSMUSG00000027710	Acad9	-0.601639	0.00127165	-0.484753	1.66479e-05	miR-541-5p		248.5	149			96.2114	359
28199	ENSMUSG00000022214	Dcaf11	-0.602338	0.000359408	-0.897365	6.77333e-27	miR-127-5p		499.5	4			22.3495	102
28199	ENSMUSG00000022214	Dcaf11	-0.602338	0.000359408	-0.897365	6.77333e-27	miR-540-3p	290	186				116.125	434
69554	ENSMUSG00000020978	Klhdc2	-0.602532	8.4e-06	-0.32051	0.016239	miR-381-3p	583	869				355.889	1074
69554	ENSMUSG00000020978	Klhdc2	-0.602532	8.4e-06	-0.32051	0.016239	miR-300-3p	124	335.5				101.983	409
74868	ENSMUSG00000062373	Tmem65	-0.604735	0.000252777	-1.05458	1.33056e-20	miR-134-5p			325.5		51	64.4215	297
74868	ENSMUSG00000062373	Tmem65	-0.604735	0.000252777	-1.05458	1.33056e-20	miR-411-3p			97		28	26.0576	112
66307	ENSMUSG00000024601	Isoc1	-0.605861	0.0273597	-0.413075	0.00126767	miR-540-3p		186	423			140.248	531
18201	ENSMUSG00000028245	Nsmaf	-0.608855	0.00031767	-0.560283	1.55879e-09	miR-380-5p		498.5	399			222.992	605
233107	ENSMUSG00000030499	Kctd15	-0.611087	0.0026078	-0.916353	1.27344e-14	miR-377-3p		327.5		483		198.861	703
233107	ENSMUSG00000030499	Kctd15	-0.611087	0.0026078	-0.916353	1.27344e-14	miR-381-3p	260	483.5		192		96.3317	355
14718	ENSMUSG00000025190	Got1	-0.615213	2.08e-07	-0.845552	9.49884e-13	miR-433-3p			284.5		14	31.5555	156
320183	ENSMUSG00000051236	Msrb3	-0.6161	3.39e-05	-0.437662	0.00141066	miR-381-3p	502	517				254.722	897
227693	ENSMUSG00000039686	Zer1	-0.61613	0.0103848	-0.440428	0.000112363	miR-673-5p		592			477	265.699	1180
320150	ENSMUSG00000035798	Zdhhc17	-0.618411	0.00635057	-0.285489	0.017338	miR-543-3p		1167.5		23		81.9337	312
320150	ENSMUSG00000035798	Zdhhc17	-0.618411	0.00635057	-0.285489	0.017338	miR-431-5p			335		52	65.9924	305
68477	ENSMUSG00000002222	Rmnd5a	-0.624316	1.32e-06	-0.697909	2.05726e-08	miR-495-3p	283	1356				309.737	1130
68477	ENSMUSG00000002222	Rmnd5a	-0.624316	1.32e-06	-0.697909	2.05726e-08	miR-377-3p		170.5		75		56.5409	215
68477	ENSMUSG00000002222	Rmnd5a	-0.624316	1.32e-06	-0.697909	2.05726e-08	miR-673-5p	6	129		451	347	26.2272	87
71886	ENSMUSG00000028396	2310002L09Rik	-0.625331	1.93e-05	-1.38122	1.43139e-31	miR-127-3p			73	150		52.3211	160
71886	ENSMUSG00000028396	2310002L09Rik	-0.625331	1.93e-05	-1.38122	1.43139e-31	miR-299a-5p	134	101				58.1679	129
74287	ENSMUSG00000055239	Kcmf1	-0.626178	2.75e-06	-0.447769	3.05808e-07	miR-411-3p	181	23		8	18	6.95636	18
117146	ENSMUSG00000029577	Ube3b	-0.62777	0.00128225	-0.61136	2.81376e-07	miR-666-5p			83	328		82.4985	243
68877	ENSMUSG00000022553	Maf1	-0.629859	0.000146918	-0.636151	1.03227e-10	miR-379-5p			151.5	595		150.119	495
68877	ENSMUSG00000022553	Maf1	-0.629859	0.000146918	-0.636151	1.03227e-10	miR-540-3p		56	137			43.795	161
66733	ENSMUSG00000045246	Kcng4	-0.630079	0.0382156	-1.39662	2.10281e-09	miR-127-5p			171.5		136	76.361	372
68539	ENSMUSG00000034659	Tmem109	-0.635987	8.1e-06	-0.387558	0.000106077	miR-666-5p			149	571		145.842	364
103554	ENSMUSG00000040850	Psme4	-0.636065	7.95e-06	-0.341543	0.0157893	miR-134-5p		228	158			94.8999	422
103554	ENSMUSG00000040850	Psme4	-0.636065	7.95e-06	-0.341543	0.0157893	miR-377-3p	262	160	62.5	212		38.3795	129
57435	ENSMUSG00000002831	Plin4	-0.63913	4.79e-05	-1.86866	5.65061e-16	miR-673-5p			93	3		8.35165	16
56709	ENSMUSG00000020109	Dnajb12	-0.639791	0.0163615	-0.457397	4.4151e-05	miR-541-5p	106.5	352	471			86.7993	329
217378	ENSMUSG00000020657	Dnajc27	-0.640771	8.68e-05	-0.772736	6.51991e-11	miR-379-5p		188	268			112.232	410
217378	ENSMUSG00000020657	Dnajc27	-0.640771	8.68e-05	-0.772736	6.51991e-11	miR-299a-3p	113	92				50.9804	108
217378	ENSMUSG00000020657	Dnajc27	-0.640771	8.68e-05	-0.772736	6.51991e-11	miR-673-5p	381		649			248.631	1117
217378	ENSMUSG00000020657	Dnajc27	-0.640771	8.68e-05	-0.772736	6.51991e-11	miR-381-3p		931	119.5	49		58.6656	209
217378	ENSMUSG00000020657	Dnajc27	-0.640771	8.68e-05	-0.772736	6.51991e-11	miR-411-3p	83	361	69.5			42.5666	200
72981	ENSMUSG00000030753	Thap12	-0.642194	2.75e-05	-0.73398	1.9352e-08	miR-381-3p	645	382.5				248.351	886
72981	ENSMUSG00000030753	Thap12	-0.642194	2.75e-05	-0.73398	1.9352e-08	miR-369-5p		41.5	57	4		7.05028	20
56350	ENSMUSG00000025035	Arl3	-0.646463	0.00214943	-0.582755	2.88695e-10	miR-540-3p	21	28		4		4.43293	5
224860	ENSMUSG00000038910	Plcl2	-0.648614	6.4e-05	-0.386397	2.00548e-05	miR-381-3p	459	643.5				271.738	938
224860	ENSMUSG00000038910	Plcl2	-0.648614	6.4e-05	-0.386397	2.00548e-05	miR-673-5p	412		229.5	545	50	56.3251	266
223455	ENSMUSG00000039100	2021-03-06	-0.649425	2.62e-06	-0.618207	3.51667e-06	miR-381-3p	66	747				111.02	422
223455	ENSMUSG00000039100	2021-03-06	-0.649425	2.62e-06	-0.618207	3.51667e-06	miR-543-3p	446	1250		192		158.268	588
223455	ENSMUSG00000039100	2021-03-06	-0.649425	2.62e-06	-0.618207	3.51667e-06	miR-673-5p	395	328.5			341	117.898	597
29869	ENSMUSG00000004798	Ulk2	-0.653072	0.000147801	-0.654239	1.10462e-07	miR-494-3p		337.5		88		86.1684	337
22335	ENSMUSG00000008892	Vdac3	-0.656281	2.36e-07	-0.687587	7.33914e-16	miR-673-5p	663		256			205.99	970
170719	ENSMUSG00000022307	Oxr1	-0.656336	4.89e-05	-0.34383	0.00155107	miR-381-3p	113	483.5				116.871	452
170719	ENSMUSG00000022307	Oxr1	-0.656336	4.89e-05	-0.34383	0.00155107	miR-411-3p	56	345.5				69.5485	350
170719	ENSMUSG00000022307	Oxr1	-0.656336	4.89e-05	-0.34383	0.00155107	miR-127-5p	59				52	27.6948	125
433375	ENSMUSG00000040713	Creg1	-0.656471	0.0019877	-0.495089	5.35333e-09	miR-299a-5p	159	63				50.0425	110
217198	ENSMUSG00000035172	Plekhh3	-0.656637	0.00574224	-0.307407	0.0259802	miR-495-3p	546	174.5	232	467		79.6871	299
227154	ENSMUSG00000026027	Stradb	-0.662619	4.68e-06	-0.615967	7.13187e-08	miR-673-5p		56	670			96.8504	482
22317	ENSMUSG00000030337	Vamp1	-0.662903	0.00345167	-0.480808	6.94087e-08	miR-541-5p		187.5	388	87		61.659	234
26374	ENSMUSG00000040782	Cop1	-0.664257	0.000102533	-0.400409	1.59895e-05	miR-543-3p			80	331		81.3634	308
26374	ENSMUSG00000040782	Cop1	-0.664257	0.000102533	-0.400409	1.59895e-05	miR-127-5p			120.5		185	74.6534	368
233335	ENSMUSG00000030554	Synm	-0.667654	2.15e-06	-1.20718	6.13164e-11	miR-134-5p	47				100	34.2783	155
233335	ENSMUSG00000030554	Synm	-0.667654	2.15e-06	-1.20718	6.13164e-11	miR-431-5p			345.5	407	14	41.7768	198
69564	ENSMUSG00000004939	Nmrk2	-0.66824	0.00189732	-0.458058	0.00242886	miR-409-3p		14.5	284.5	182		30.296	114
20238	ENSMUSG00000046876	Atxn1	-0.67093	4.99e-05	-0.783155	7.74092e-10	miR-543-3p	163	16.5				25.9302	74
20238	ENSMUSG00000046876	Atxn1	-0.67093	4.99e-05	-0.783155	7.74092e-10	miR-370-3p	25	292				42.72	166
20238	ENSMUSG00000046876	Atxn1	-0.67093	4.99e-05	-0.783155	7.74092e-10	miR-377-3p	20	68				18.4391	53
75695	ENSMUSG00000029392	Rilpl1	-0.672191	0.000681706	-1.1827	9.4973e-22	miR-673-5p	585	82.5			223	73.5953	353
66839	ENSMUSG00000024442	Dele1	-0.684928	0.000571285	-1.01724	2.63376e-25	miR-379-5p			48	295	53	30.2918	141
12972	ENSMUSG00000028199	Cryz	-0.696344	0.0432711	-0.61357	1.05572e-05	miR-668-3p			61	99		38.8555	158
102103	ENSMUSG00000045636	Mtus1	-0.698684	3.16e-05	-0.632378	2.48142e-07	miR-154-5p	71	117.5			118	33.1593	177
103841	ENSMUSG00000018378	Cuedc1	-0.704553	1.97e-05	-0.710054	2.65551e-09	miR-494-3p	118	513.5				123.078	467
269587	ENSMUSG00000028906	Epb41	-0.711472	5.71e-05	-0.783442	5.56353e-19	miR-381-3p	599	869				360.739	1078
20230	ENSMUSG00000023927	Satb1	-0.713702	0.000589567	-0.634235	1.43128e-06	miR-381-3p	189	255				109.767	418
20230	ENSMUSG00000023927	Satb1	-0.713702	0.000589567	-0.634235	1.43128e-06	miR-495-3p	65	766				111.568	423
20230	ENSMUSG00000023927	Satb1	-0.713702	0.000589567	-0.634235	1.43128e-06	miR-127-5p	16	479				43.7721	220
12325	ENSMUSG00000021820	Camk2g	-0.71527	1.55e-06	-0.671665	2.4653e-19	miR-543-3p	388	540				228.867	771
12325	ENSMUSG00000021820	Camk2g	-0.71527	1.55e-06	-0.671665	2.4653e-19	miR-495-3p	128	317.5		462		88.5953	334
12325	ENSMUSG00000021820	Camk2g	-0.71527	1.55e-06	-0.671665	2.4653e-19	miR-127-5p	193	327.5			123	66.0344	330
12325	ENSMUSG00000021820	Camk2g	-0.71527	1.55e-06	-0.671665	2.4653e-19	miR-154-5p	81	64	131.5		55	19.5627	88
272396	ENSMUSG00000030515	Tarsl2	-0.715588	4.27e-06	-0.971724	9.07016e-11	miR-154-5p			173		75	56.9539	269
56298	ENSMUSG00000059811	Atl2	-0.721307	4.69e-07	-0.837935	5.25543e-22	miR-381-3p	296	125				96.1769	354
56298	ENSMUSG00000059811	Atl2	-0.721307	4.69e-07	-0.837935	5.25543e-22	miR-299a-5p	191	136				80.5854	172
56298	ENSMUSG00000059811	Atl2	-0.721307	4.69e-07	-0.837935	5.25543e-22	miR-495-3p	234	166.5		437		85.753	320
56298	ENSMUSG00000059811	Atl2	-0.721307	4.69e-07	-0.837935	5.25543e-22	miR-543-3p	103	178.5		408		65.2515	243
56298	ENSMUSG00000059811	Atl2	-0.721307	4.69e-07	-0.837935	5.25543e-22	miR-377-3p	51	182		243		43.7148	157
57339	ENSMUSG00000042686	Jph1	-0.721317	3.14e-06	-0.519043	8.56708e-05	miR-673-5p	130				352	106.958	541
57339	ENSMUSG00000042686	Jph1	-0.721317	3.14e-06	-0.519043	8.56708e-05	miR-381-3p	698	321		64		80.9827	300
57339	ENSMUSG00000042686	Jph1	-0.721317	3.14e-06	-0.519043	8.56708e-05	miR-543-3p	363	873		361		161.816	603
56758	ENSMUSG00000027763	Mbnl1	-0.723353	1.05e-08	-0.474243	1.60457e-08	miR-495-3p	71	36.5				25.4534	64
56758	ENSMUSG00000027763	Mbnl1	-0.723353	1.05e-08	-0.474243	1.60457e-08	miR-543-3p	270	211				119.342	471
56758	ENSMUSG00000027763	Mbnl1	-0.723353	1.05e-08	-0.474243	1.60457e-08	miR-154-5p	99	114		383		54.299	260
56758	ENSMUSG00000027763	Mbnl1	-0.723353	1.05e-08	-0.474243	1.60457e-08	miR-541-5p	20.5	346.5		16		16.1462	54
56758	ENSMUSG00000027763	Mbnl1	-0.723353	1.05e-08	-0.474243	1.60457e-08	miR-134-5p	2	73.5			29	5.40485	12
70591	ENSMUSG00000057181	5730455P16Rik	-0.7288	3.51e-05	-0.546017	9.00402e-07	miR-127-5p	39	421			68	34.5804	176
18045	ENSMUSG00000020248	Nfyb	-0.736516	0.000535171	-0.437601	0.000112583	miR-381-3p	61	168				50.6162	174
71207	ENSMUSG00000020029	Nudt4	-0.738102	1.52e-07	-0.399765	0.00131459	miR-381-3p	166	64				51.5364	180
71207	ENSMUSG00000020029	Nudt4	-0.738102	1.52e-07	-0.399765	0.00131459	miR-154-5p			140		89	55.8122	265
71207	ENSMUSG00000020029	Nudt4	-0.738102	1.52e-07	-0.399765	0.00131459	miR-380-5p		417.5		27		53.086	195
246221	ENSMUSG00000071711	Mpst	-0.741376	0.00190662	-0.928905	7.98835e-18	miR-540-3p		34	25.5	59		12.3738	28
63953	ENSMUSG00000039384	Dusp10	-0.741498	0.000466241	-0.421585	0.00321517	miR-411-3p	172	29		109	4	9.60049	29
381820	ENSMUSG00000072704	Smim10l1	-0.754608	7.83e-09	-0.521165	1.8005e-11	miR-379-5p			32		23	13.5647	55
381820	ENSMUSG00000072704	Smim10l1	-0.754608	7.83e-09	-0.521165	1.8005e-11	miR-376b-3p		332.5	328			165.121	608
14707	ENSMUSG00000068523	Gng5	-0.755623	3.48e-10	-0.672695	1.62843e-14	miR-543-3p		1195.5	234			264.456	866
14707	ENSMUSG00000068523	Gng5	-0.755623	3.48e-10	-0.672695	1.62843e-14	miR-376b-3p		86	265			75.4818	296
55983	ENSMUSG00000035357	Pdzrn3	-0.758983	2.79e-07	-0.963097	1.12956e-18	miR-381-3p	662	447				271.99	940
55983	ENSMUSG00000035357	Pdzrn3	-0.758983	2.79e-07	-0.963097	1.12956e-18	miR-494-3p	208	343.5				133.649	510
55983	ENSMUSG00000035357	Pdzrn3	-0.758983	2.79e-07	-0.963097	1.12956e-18	miR-433-3p	145	37			106	27.6166	138
26554	ENSMUSG00000004364	Cul3	-0.759639	9.66e-08	-0.419067	0.000131907	miR-127-5p	147	30	244.5			34.181	175
207592	ENSMUSG00000039976	Tbc1d16	-0.763909	0.0106544	-0.778198	3.19086e-06	miR-431-5p		250		29	95	29.4374	131
230796	ENSMUSG00000037622	Wdtc1	-0.768153	1.17e-05	-0.719151	1.06357e-06	miR-495-3p	620	882.5		350		192.134	758
67374	ENSMUSG00000053062	Jam2	-0.773167	5.66e-06	-0.752516	6.46785e-08	miR-495-3p		1393	228.5			282.091	1064
67015	ENSMUSG00000030301	Ccdc91	-0.77376	1.69e-05	-0.696408	2.71193e-14	miR-134-5p			388.5		90	93.4947	417
99887	ENSMUSG00000028132	Tmem56	-0.780649	0.00121857	-0.62161	0.0382607	miR-381-3p	137	676.5				152.217	591
99887	ENSMUSG00000028132	Tmem56	-0.780649	0.00121857	-0.62161	0.0382607	miR-495-3p	8	231		292		27.1377	73
235599	ENSMUSG00000037977	6430571L13Rik	-0.780822	0.000587651	-0.984481	1.47182e-10	miR-540-3p		212	690			191.233	687
22359	ENSMUSG00000024924	Vldlr	-0.789124	4.91e-10	-0.546195	0.00257085	miR-411-5p			95.5	257		78.3318	333
22359	ENSMUSG00000024924	Vldlr	-0.789124	4.91e-10	-0.546195	0.00257085	miR-540-3p	362.5	399.5	377			126.454	468
19042	ENSMUSG00000021096	Ppm1a	-0.798421	7.6e-10	-0.649551	9.67222e-11	miR-127-5p		164.5	135			74.5109	367
19042	ENSMUSG00000021096	Ppm1a	-0.798421	7.6e-10	-0.649551	9.67222e-11	miR-377-3p		72		262		68.6731	270
19042	ENSMUSG00000021096	Ppm1a	-0.798421	7.6e-10	-0.649551	9.67222e-11	miR-433-3p	59	154.5			141	36.242	192
66889	ENSMUSG00000031438	Rnf128	-0.79889	0.00050754	-0.399227	0.00167583	miR-127-5p	75	91.5	157.5		193	30.0449	152
28295	ENSMUSG00000053329	Gatd3a	-0.80153	4.27e-07	-0.799409	1.57122e-11	miR-370-3p			138	187		80.3212	321
12315	ENSMUSG00000019370	Calm3	-0.802594	1.77e-08	-0.308464	0.0273557	miR-673-5p	374	96	333			76.221	369
54485	ENSMUSG00000027314	Dll4	-0.804556	0.0006848	-0.532932	0.0120246	miR-381-3p	609	232				187.941	723
226922	ENSMUSG00000028033	Kcnq5	-0.820635	0.00214943	-1.35039	6.69404e-25	miR-543-3p	217	879				218.371	750
16518	ENSMUSG00000041695	Kcnj2	-0.823386	5.1e-06	-1.08004	8.13189e-12	miR-411-3p	47	94.5				33.3223	159
16518	ENSMUSG00000041695	Kcnj2	-0.823386	5.1e-06	-1.08004	8.13189e-12	miR-431-5p	2	2			45	1.88207	2
12908	ENSMUSG00000026853	Crat	-0.833392	1.21e-06	-0.964556	7.51504e-16	miR-370-3p			369.5	70		80.413	322
14555	ENSMUSG00000023019	Gpd1	-0.837708	4.05e-05	-1.10647	1.25552e-22	miR-379-5p		215	288		15	32.5227	153
68646	ENSMUSG00000022253	Nadk2	-0.842825	0.000602612	-1.12036	1.70036e-16	miR-494-3p		597		110		128.131	487
233246	ENSMUSG00000055489	Ano5	-0.84453	1.17e-09	-0.652825	5.08163e-08	miR-433-3p	6	35				7.24569	26.5
72543	ENSMUSG00000038740	Mvb12b	-0.848886	1.59e-05	-0.366921	0.00898755	miR-540-3p		679		191		180.062	653
72543	ENSMUSG00000038740	Mvb12b	-0.848886	1.59e-05	-0.366921	0.00898755	miR-377-3p	107	19		234		26.0213	83
207781	ENSMUSG00000045975	C2cd2	-0.851772	9.03e-08	-1.00406	1.30518e-21	miR-673-5p			549		93	112.979	576
18767	ENSMUSG00000027499	Pkia	-0.871044	2.13e-14	-0.681729	4.69459e-08	miR-381-3p		944.5		249		242.477	877
18767	ENSMUSG00000027499	Pkia	-0.871044	2.13e-14	-0.681729	4.69459e-08	miR-377-3p	86			133		53.4743	197
75744	ENSMUSG00000074093	Svip	-0.872877	4.42e-05	-0.948159	7.30664e-12	miR-154-5p			81.5		102	45.5878	227
12725	ENSMUSG00000004319	Clcn3	-0.875839	1.88e-06	-0.723293	9.86767e-15	miR-495-3p		1299.5		608		444.437	1403
99003	ENSMUSG00000074994	Qser1	-0.883584	1.6e-08	-0.856429	1.3127e-12	miR-495-3p	540	597		438.5		173.643	684
235584	ENSMUSG00000053716	Dusp7	-0.888127	0.000244084	-1.02008	1.75001e-08	miR-381-3p	508	843.5				327.299	1046
235584	ENSMUSG00000053716	Dusp7	-0.888127	0.000244084	-1.02008	1.75001e-08	miR-377-3p		276		487		183.311	657
77697	ENSMUSG00000029575	Mmab	-0.906197	1.8e-05	-0.423049	0.000189982	miR-381-3p	480	327.5				198.242	753
20679	ENSMUSG00000051910	Sox6	-0.924039	6.29e-08	-0.680933	4.37275e-05	miR-666-5p	2		208			10.198	38
20679	ENSMUSG00000051910	Sox6	-0.924039	6.29e-08	-0.680933	4.37275e-05	miR-495-3p	238	57		163		43.4269	145
68910	ENSMUSG00000068551	Zfp467	-0.943368	0.000596976	-0.389772	0.00771492	miR-431-5p	101	123				55.7293	262
68910	ENSMUSG00000068551	Zfp467	-0.943368	0.000596976	-0.389772	0.00771492	miR-127-5p	2	1				0.707107	1
17349	ENSMUSG00000048416	Mlf1	-0.943582	1.54e-09	-1.61924	3.72948e-19	miR-543-3p		398.5		27		51.864	182
208076	ENSMUSG00000035934	Pknox2	-0.945349	7.54e-05	-0.71439	1.08505e-09	miR-154-5p	36	79				26.6646	133
208076	ENSMUSG00000035934	Pknox2	-0.945349	7.54e-05	-0.71439	1.08505e-09	miR-543-3p		489	221			164.369	607
208076	ENSMUSG00000035934	Pknox2	-0.945349	7.54e-05	-0.71439	1.08505e-09	miR-127-5p	29		50			19.0394	82
208076	ENSMUSG00000035934	Pknox2	-0.945349	7.54e-05	-0.71439	1.08505e-09	miR-673-5p	569	99	29			39.2579	169
217666	ENSMUSG00000020988	L2hgdh	-0.94698	4.86e-07	-0.985444	3.7681e-14	miR-673-5p		538.5	351		160	103.852	523
73095	ENSMUSG00000002346	Slc25a42	-0.947582	8.48e-05	-0.983411	7.94503e-28	miR-667-3p		330.5	11			30.1476	78
26457	ENSMUSG00000031808	Slc27a1	-0.961437	9.11e-09	-1.22259	1.86372e-16	miR-370-3p			232.5	74		65.5839	252
241303	ENSMUSG00000090157	Fam78a	-0.962146	1.93e-05	-1.05667	0.000281609	miR-299a-3p	223	68				61.5711	130
242785	ENSMUSG00000073700	Klhl21	-0.97092	3.79e-14	-1.03342	3.59858e-25	miR-666-5p			293	217		126.076	330
268859	ENSMUSG00000008658	Rbfox1	-0.971362	1.58e-09	-0.506481	1.03798e-07	miR-543-3p	400			286		169.115	618
268859	ENSMUSG00000008658	Rbfox1	-0.971362	1.58e-09	-0.506481	1.03798e-07	miR-673-5p	70				81	37.6497	151
99031	ENSMUSG00000042359	Osbpl6	-0.971701	3.84e-07	-1.15164	1.60605e-11	miR-494-3p	122	181.5		8		18.7206	53
77559	ENSMUSG00000033400	Agl	-0.987044	7.67e-14	-0.740455	8.75176e-08	miR-673-5p		647.5			313	225.093	1027
77559	ENSMUSG00000033400	Agl	-0.987044	7.67e-14	-0.740455	8.75176e-08	miR-377-3p			376	306		169.6	616
378431	ENSMUSG00000039891	Txlnb	-0.991982	3.26e-10	-1.17662	4.2067e-15	miR-543-3p	130	409.5		389		91.5365	351
12322	ENSMUSG00000024617	Camk2a	-1.00897	3.56e-09	-0.59427	7.95182e-06	miR-495-3p	154	941		448		133.97	521
12322	ENSMUSG00000024617	Camk2a	-1.00897	3.56e-09	-0.59427	7.95182e-06	miR-673-5p	106	234	317		369	58.0219	274
110880	ENSMUSG00000001027	Scn4a	-1.01734	2.24e-08	-1.00065	3.44881e-10	miR-127-3p		28	20.5			11.9791	54
66397	ENSMUSG00000020386	Sar1b	-1.03508	1.73e-12	-0.995562	3.87274e-19	miR-299a-3p	14	79				16.6283	30
66771	ENSMUSG00000018415	Gid4	-1.04768	1.7e-08	-0.762372	5.2462e-08	miR-381-3p	341	958				285.779	970
66771	ENSMUSG00000018415	Gid4	-1.04768	1.7e-08	-0.762372	5.2462e-08	miR-543-3p	13	280		321		35.1087	113
14371	ENSMUSG00000049551	Fzd9	-1.05327	7.6e-05	-0.566494	0.00910101	miR-673-5p	630	215		494	452	104.256	527
54601	ENSMUSG00000042903	Foxo4	-1.05524	4.61e-10	-0.76278	6.94048e-12	miR-668-3p	14	126				21	80
18671	ENSMUSG00000040584	Abcb1a	-1.09412	0.00190152	-0.912523	0.000380601	miR-543-3p		1114		212		242.986	819
74182	ENSMUSG00000027346	Gpcpd1	-1.10557	3.09e-16	-1.64096	3.07574e-25	miR-300-3p	29			158		33.8452	134
74182	ENSMUSG00000027346	Gpcpd1	-1.10557	3.09e-16	-1.64096	3.07574e-25	miR-543-3p	172	1013		21		51.3647	178
12351	ENSMUSG00000000805	Car4	-1.13628	0.000307787	-1.01667	0.0281978	miR-540-3p		180.5	5.5			15.754	40
77827	ENSMUSG00000042810	Krba1	-1.13777	3.36e-07	-1.141	8.86783e-20	miR-299a-3p	11	13				5.97913	8
238564	ENSMUSG00000044951	Mylk4	-1.17727	9.57e-17	-2.52668	6.82821e-35	miR-494-3p	323	669.5		279		130.737	495
14571	ENSMUSG00000026827	Gpd2	-1.22025	7.95e-16	-0.692754	1.06865e-07	miR-673-5p	235		15		77	21.5822	63
12409	ENSMUSG00000025150	Cbr2	-1.25376	1.09e-08	-0.542609	0.000381071	miR-369-5p		17.5	1			2.09165	5
109731	ENSMUSG00000040147	Maob	-1.28916	5.91e-05	-1.43953	2.03517e-24	miR-300-3p		254		133		91.8994	363
109731	ENSMUSG00000040147	Maob	-1.28916	5.91e-05	-1.43953	2.03517e-24	miR-411-5p			159	295	21	33.1659	153
208943	ENSMUSG00000033590	Myo5c	-1.30048	2.12e-05	-1.28748	1.0844e-06	miR-673-5p	490	508				249.459	1120
14366	ENSMUSG00000049791	Fzd4	-1.30379	7.42e-06	-1.29989	2.07005e-11	miR-543-3p	86	713.5		41		45.3354	154
14366	ENSMUSG00000049791	Fzd4	-1.30379	7.42e-06	-1.29989	2.07005e-11	miR-377-3p	292	27		232		40.7653	140
14366	ENSMUSG00000049791	Fzd4	-1.30379	7.42e-06	-1.29989	2.07005e-11	miR-673-5p	432	10	124		15	13.3103	30
16716	ENSMUSG00000035606	Ky	-1.68786	3.34e-31	-1.02276	6.84504e-11	miR-411-3p		191			156	86.3076	415
21743	ENSMUSG00000003477	Inmt	-1.83403	1.51e-06	-2.95816	3.8652e-07	miR-134-5p			33	9.5		8.85297	25
380714	ENSMUSG00000020847	Rph3al	-2.08852	0.00010793	-1.04274	6.46206e-09	miR-134-5p			162.5	455		135.957	565
Table S3. List of bioinformatics predicted target genes for the selected 14 DD-miRNAs. Five prediction tools (DIANA, Targetscan, PicTar, Miranda, and miRDB) were used, generating 5,295 candidate targets predicted by at least two different tools. This list of 5,295 candidates was crossed with experimental data of transcripts that are downregulated in the injected TA muscle and in the mdx diaphragm…
